# Supplementary material
Source: Springer Nature journal article supplement (https://www.springermedizin.de/resource/supplementary/13054_2013_2872_MOESM2_ESM.pdf/9714058)

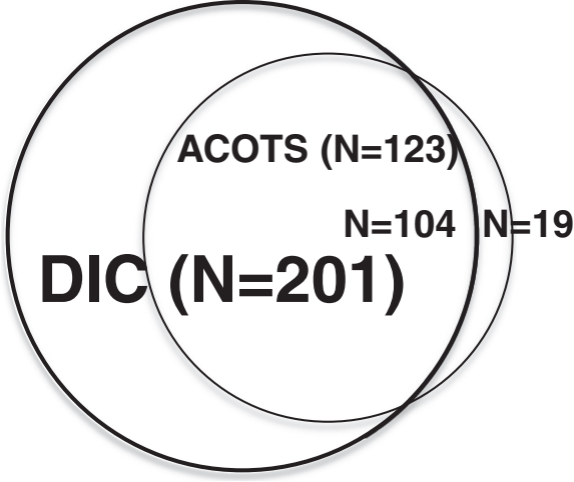

**ACOTS (N=123)**

**N=104** **N=19**

**DIC (N=201)**

Supplement: MOESM2 [file 9714058]
